# Supplementary material for: Loss and retention of resistance genes in five species of the Brassicaceae family
Source: PubMed Central journal article supplement (PMC4232680; doi:10.1186/s12870-014-0298-z), 2014-11-01

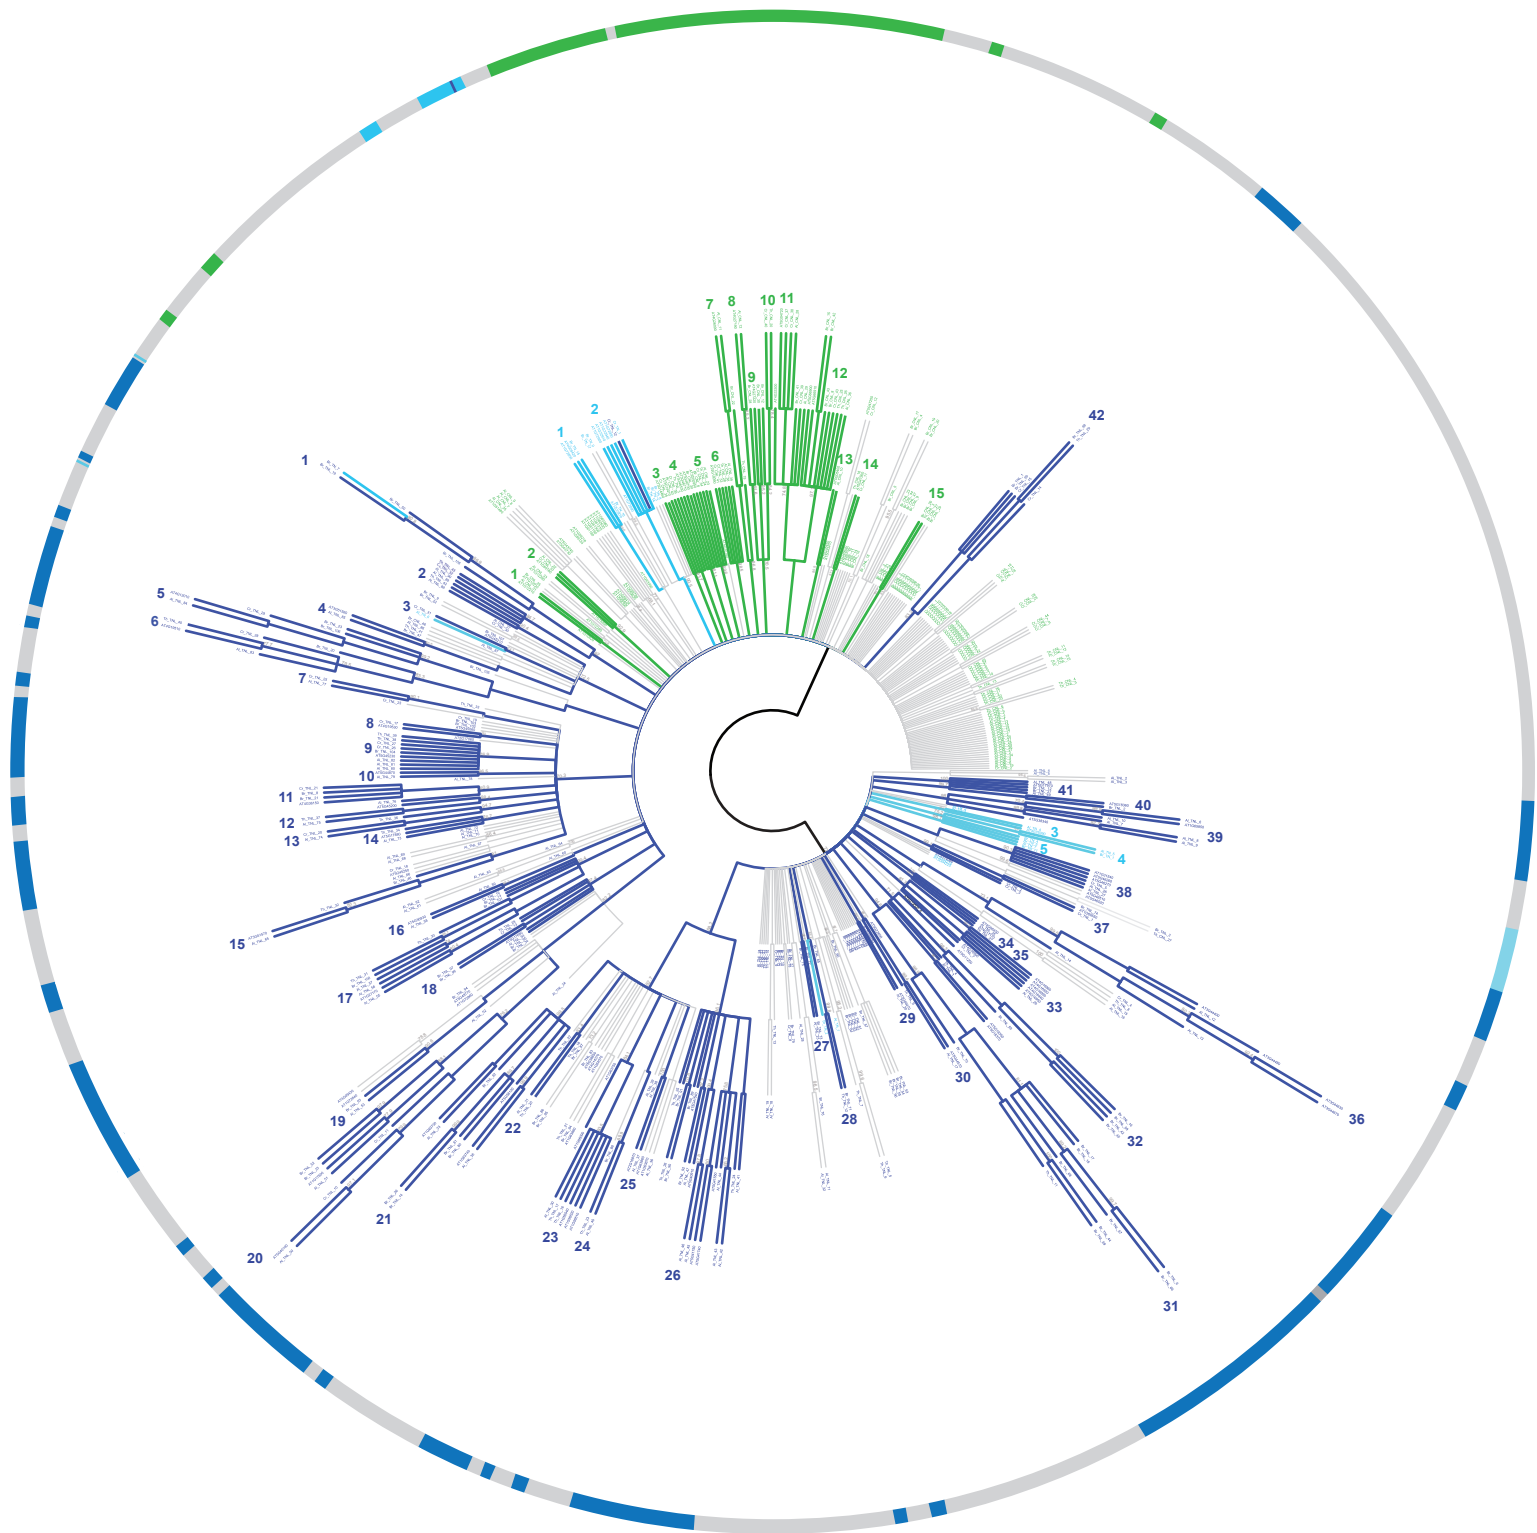

Supplement: 12870_2014_298_MOESM4_ESM.pdf [file 12870_2014_298_MOESM4_ESM.pdf]
